# Supplementary material for: Enhanced antitumor immunity by a novel small molecule HPK1 inhibitor
Source: HighWire-hosted journal article supplement (doi:10.1136/jitc-2020-001402), 2021-01-01
Supplement: jitc-2020-001402supp002_data_supplement.pdf [file jitc-2020-001402supp002_data_supplement.pdf]

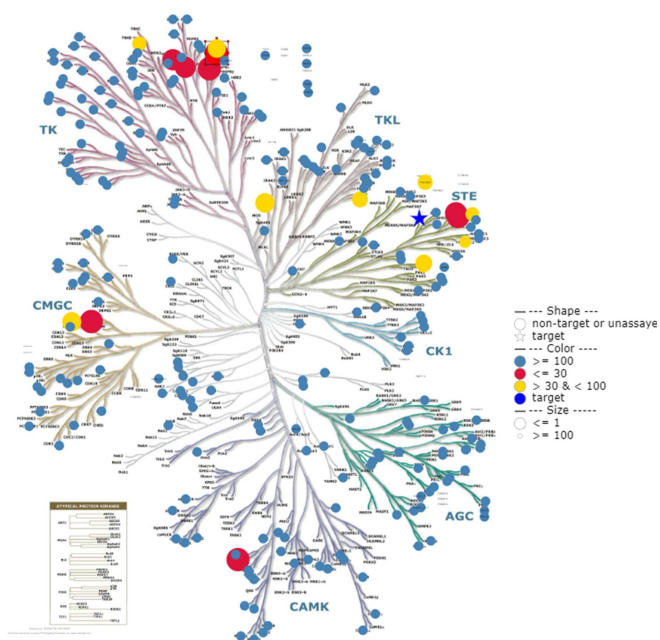

Table S1. IC50 values for kinases indicated with red and yellow dots on the kinome

| Kinases   | IC50     | Selectivity fold over HPK1 |
|-----------|----------|----------------------------|
| HPK1      | 0.002645 |                            |
| Fms/CSFR  | 0.0032   | < 30x                      |
| FLT3      | 0.025365 | < 30x                      |
| AMPKA1    | 0.044291 | < 30x                      |
| cKIT      | 0.045663 | < 30x                      |
| MST1      | 0.05512  | < 30x                      |
| IRAK4     | 0.059141 | < 30x                      |
| ICK       | 0.065128 | < 30x                      |
| MST2      | 0.078504 | < 30x                      |
| TYRO3/Sky | 0.088888 | 30-100x                    |
| MER       | 0.104664 | 30-100x                    |
| BMPR2     | 0.117737 | 30-100x                    |
| TrkA      | 0.128608 | 30-100x                    |
| MAP4K3    | 0.143525 | 30-100x                    |
| GSK3B     | 0.159609 | 30-100x                    |
| TA01      | 0.161862 | 30-100x                    |
| YSK1      | 0.167642 | 30-100x                    |
| CLK2      | 0.212268 | 30-100x                    |
| GSK3A     | 0.290103 | 30-100x                    |

Fig S1
