# Supplementary figures and images for: Enhanced antitumor immunity by a novel small molecule HPK1 inhibitor
Source: HighWire-hosted journal article supplement (doi:10.1136/jitc-2020-001402), 2021-01-01

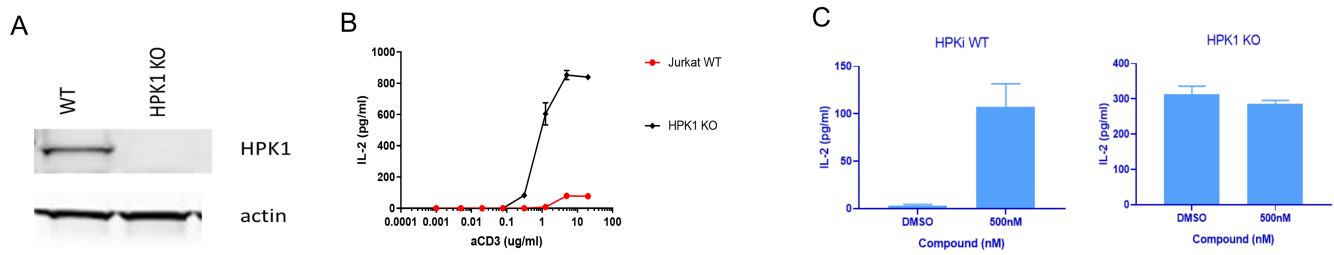

Fig S2

Supplement: jitc-2020-001402supp003_data_supplement.pdf [file jitc-2020-001402supp003_data_supplement.pdf]

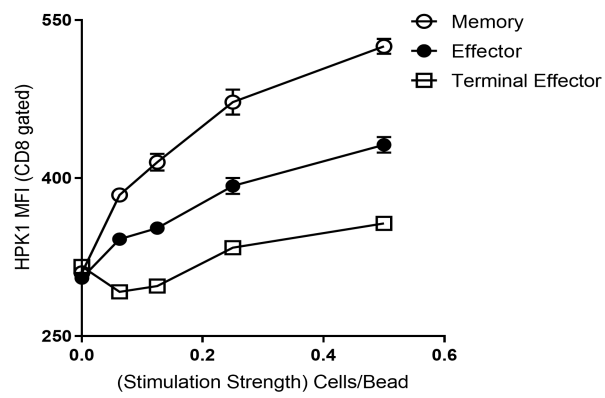

Fig S5

Supplement: jitc-2020-001402supp006_data_supplement.pdf [file jitc-2020-001402supp006_data_supplement.pdf]

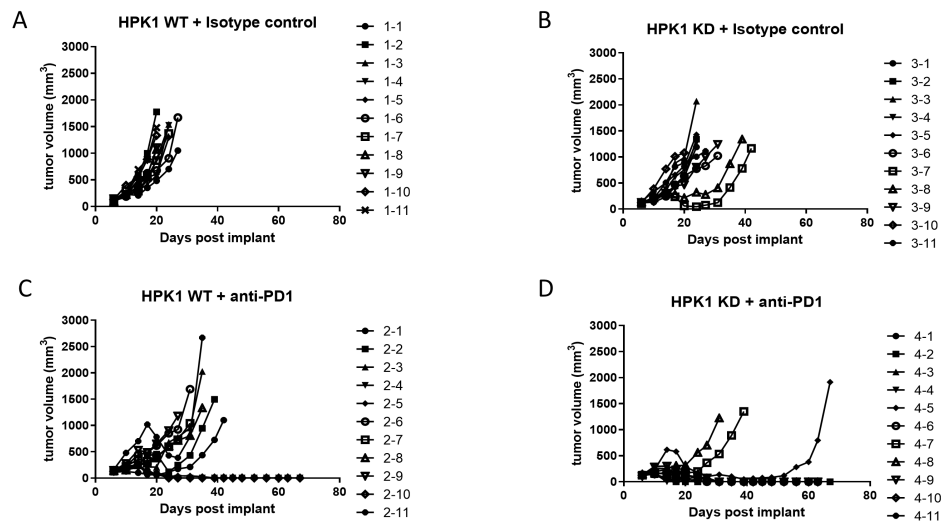

Fig S6

Supplement: jitc-2020-001402supp007_data_supplement.pdf [file jitc-2020-001402supp007_data_supplement.pdf]
