# Supplementary figures and images for: Enhanced antitumor immunity by a novel small molecule HPK1 inhibitor
Source: PubMed Central journal article supplement — J Immunother Cancer. 2021 Jan 6;9(1):e001402. doi: 10.1136/jitc-2020-001402 (PMC7789447; doi:10.1136/jitc-2020-001402), 2021-01-06

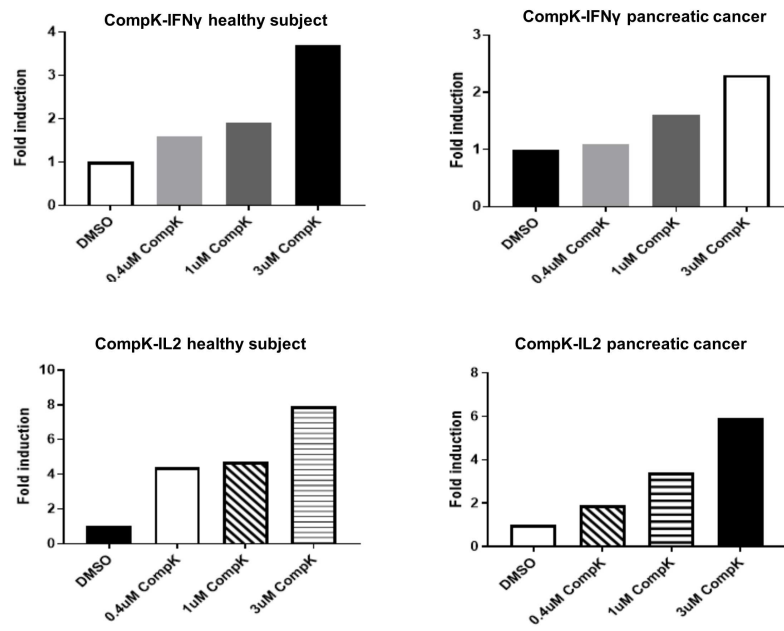

Fig S3

Supplement: jitc-2020-001402supp004.pdf [file jitc-2020-001402supp004.pdf]

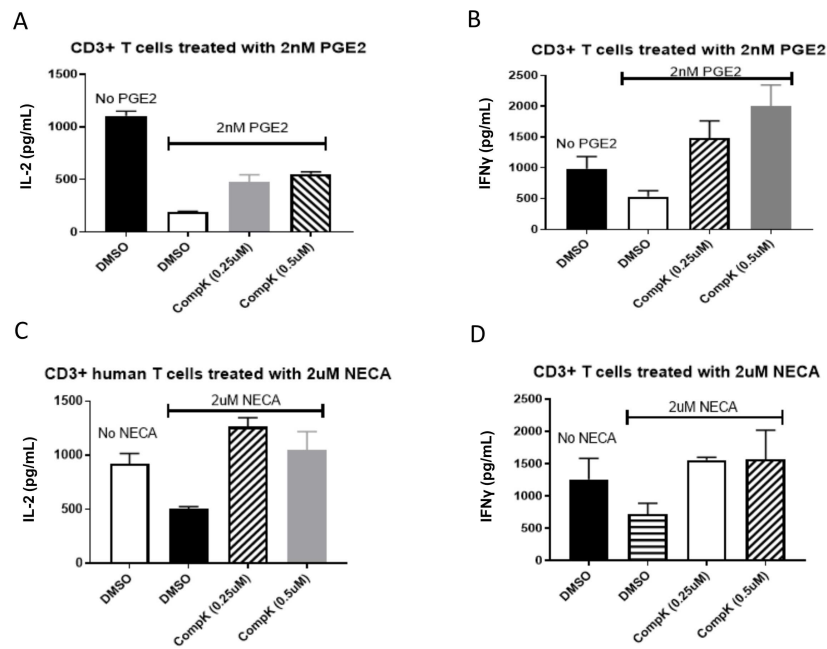

Fig S4

Supplement: jitc-2020-001402supp005.pdf [file jitc-2020-001402supp005.pdf]
